# INFOGRAPHICS IN ANESTHESIOLOGY

Complex Information for Anesthesiologists Presented Quickly and Clearly

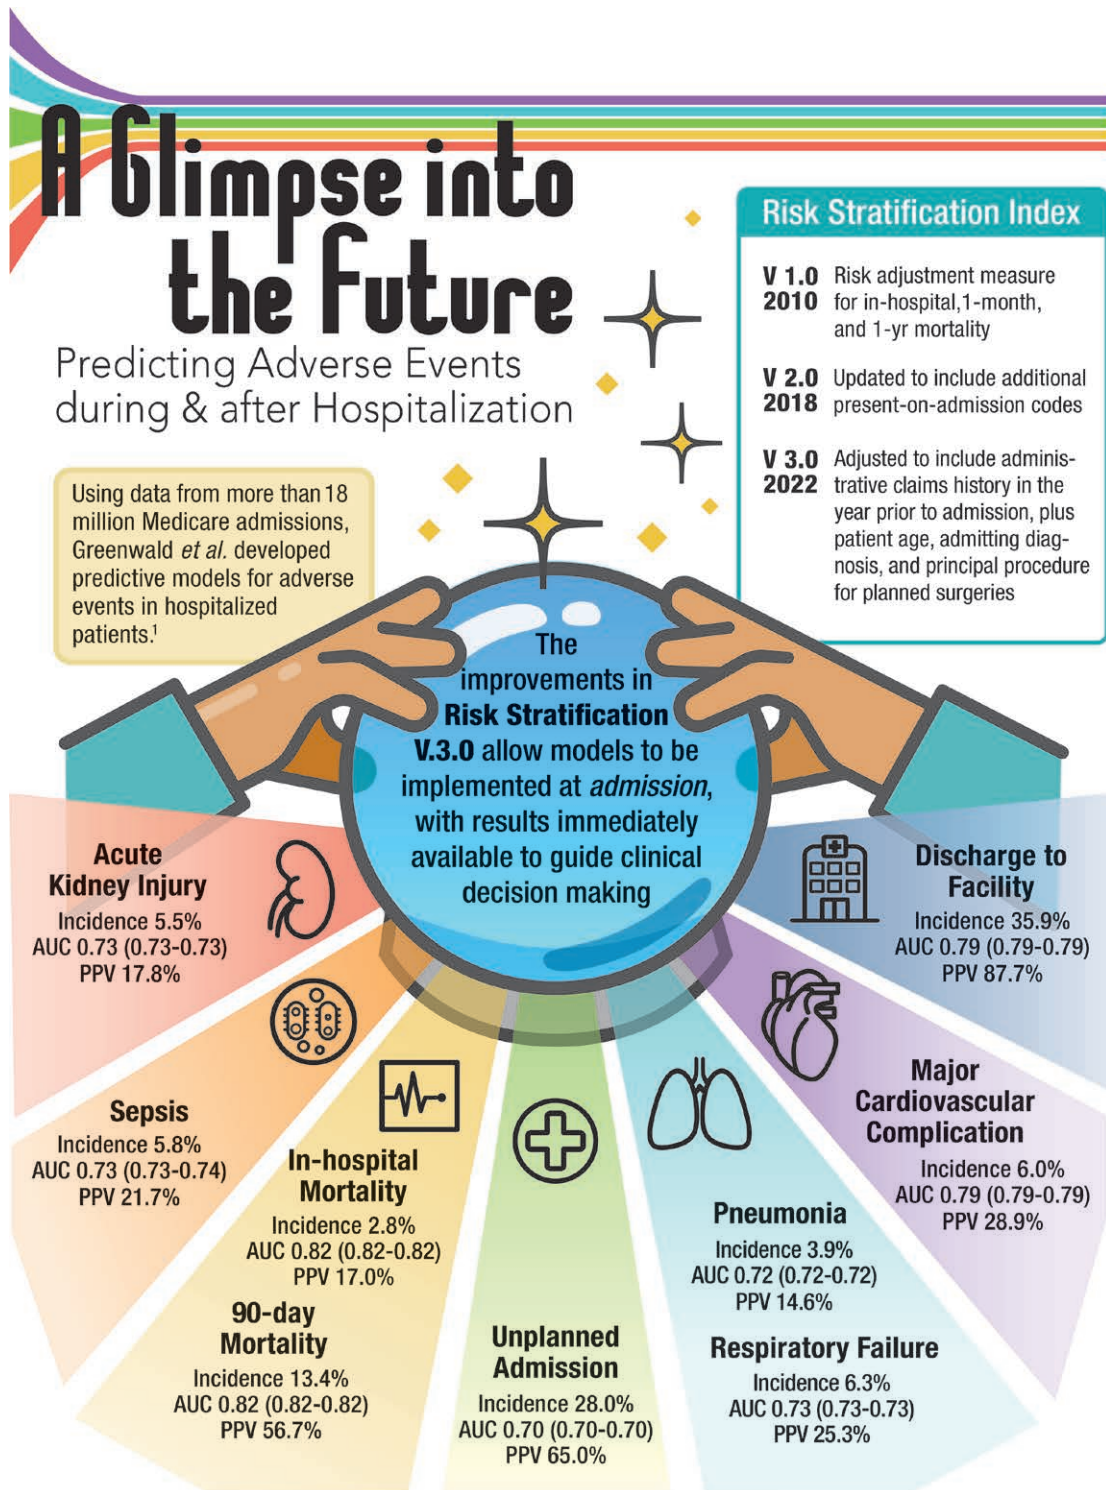

AUC, area under the receiver operating curve; PPV, positive predictive value; V, version.

Positive predictive value for all models was calculated for the top 5% risk groups for each adverse event.

Infographic created by Holly B. Ende, Vanderbilt University Medical Center; James P. Rathmell, Brigham and Women's Health Care/Harvard Medical School; and Jonathan P. Wanderer, Vanderbilt University Medical Center. Illustration by Annemarie Johnson, Vivo Visuals Studio. Address correspondence to Dr. Ende: holly.ende@vumc.org.

- Greenwald S, Chamoun GF, Chamoun NG, Clain D, Hong Z, Jordan R, Manberg PJ, Maheshwari K, Sessler DI: Risk Stratification Index 3.0, a broad set of models for predicting adverse events during and after hospital admission. *ANESTHESIOLOGY* 2022; 137:673-86
